# Supplementary material for: Improving access and continuity of care for homeless people: how could general practitioners effectively contribute? Results from a mixed study
Source: PubMed Central journal article supplement — BMJ Open. 2016 Nov 30;6(11):e013610. doi: 10.1136/bmjopen-2016-013610 (PMC5168510; doi:10.1136/bmjopen-2016-013610), 2016-11-30

## 2) Phase 1, overview 1 : How the involved GPs care for HP, overview (« involved » GPs)

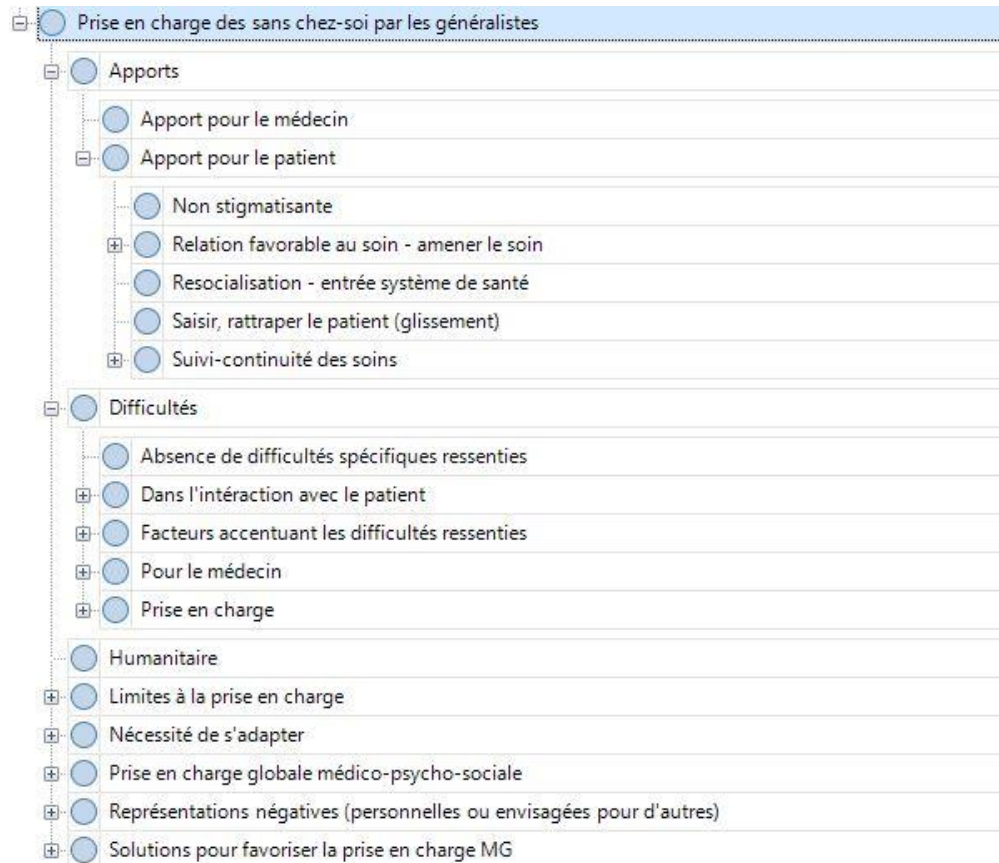

### 3) Phase 1, Focus 1 -Difficulties when caring for HP - views of « involved » GPS

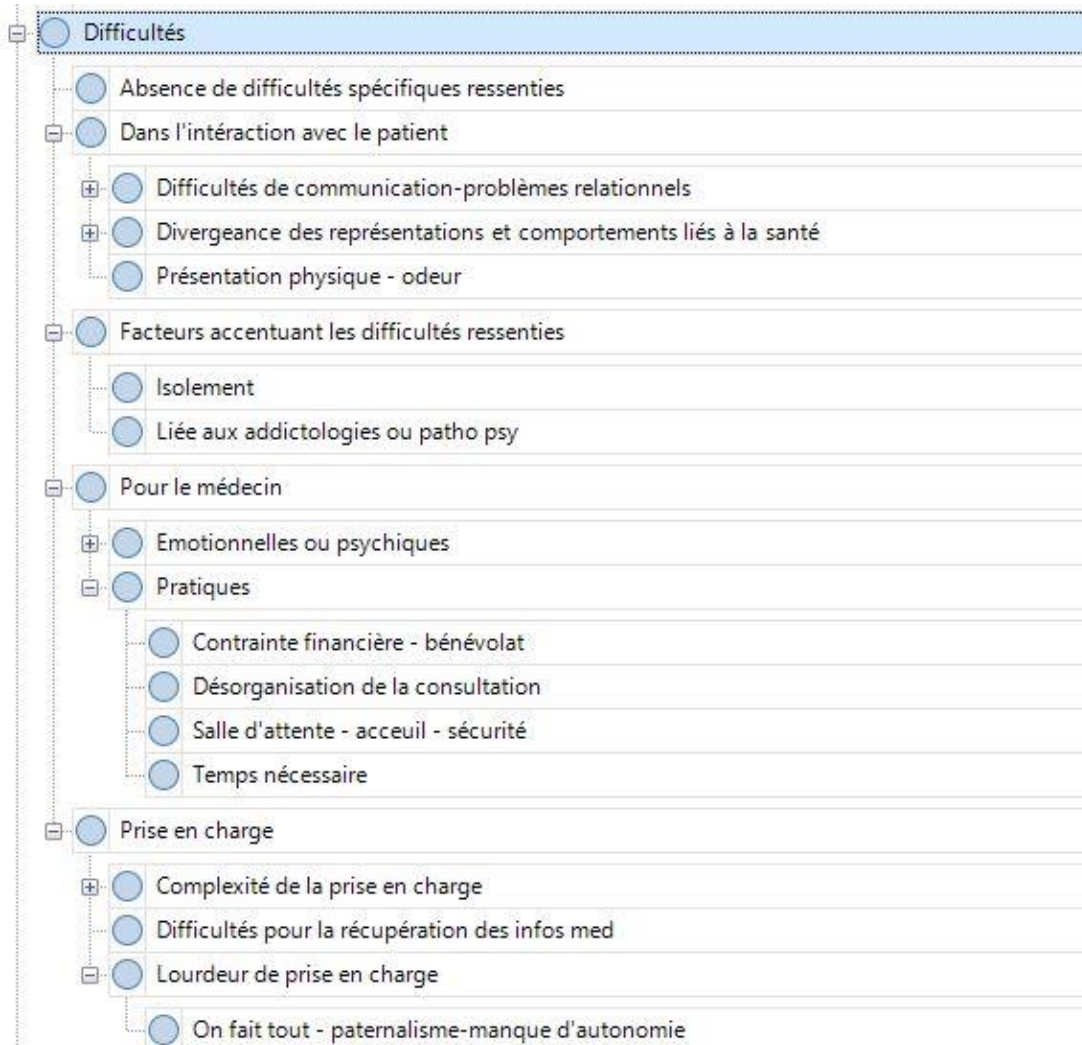

#### 4) Phase 1, focus 2 - Barriers for treating well HP

- ☐  Limites à la prise en charge
  - Carences en terme de prévention
  - ☐  Parfois une réponse des professionnels inadéquate
    - Prise en charge faussement adéquate - inadéquate
    - Décalage - difficultés de compréhension des problématiques - de représentation pour le MG
    - Méconnaissance (problématiques-gestion sociale)
  - ☐  Suivi et coordination
    - Carence d'informations médicales
    - Continuité et pathologies chroniques-impossible
    - ☐  Difficultés du MG à mettre en place une coordination des soins pour ces patients
    - Limite des généralistes de ville - libéraux - droit commun
    - ☐  Contexte social (accès au droit commun-contexte de vie)
    - ☐  Instabilité dans la relation au soin et avec le soignant

#### 5) Phase 1, Focus 3 - GPs may adapt their practice when they care for HP

- ☐  Nécessité de s'adapter
  - Formation-compétences nouvelles-connaissances insuffisantes (problèmes, réseau...)
  - ☐  Point de vue pratique
    - Tiers payant
    - Secrétaire
    - ☐  Rendez-vous-immédiateté de réponse
  - ☐  Interaction et compréhension du patient
    - Adapter le discours, l'information
    - Dérangeant
    - Incompréhension - irritant
    - Fossé culturel - Conditions de vie
    - Temporalité
    - ☐  Relation particulière
  - ☐  Prise en charge thérapeutique
    - Importance de l'éducation-information
    - ☐  Consultations ponctuelles - pathologie aiguë
    - Variété des catégories de personnes - adaptabilité
    - Adapter ses objectifs
    - Environnement - conditions de vie du patient - contexte précarité
    - ☐  Générer la demande de soins - décoder le besoin
    - Des priorités différentes
    - ☐  Pathologies non-spécifiques, et pourtant

## 6) Phase 1, focus 4 - The importance of a global medico-psycho-social care

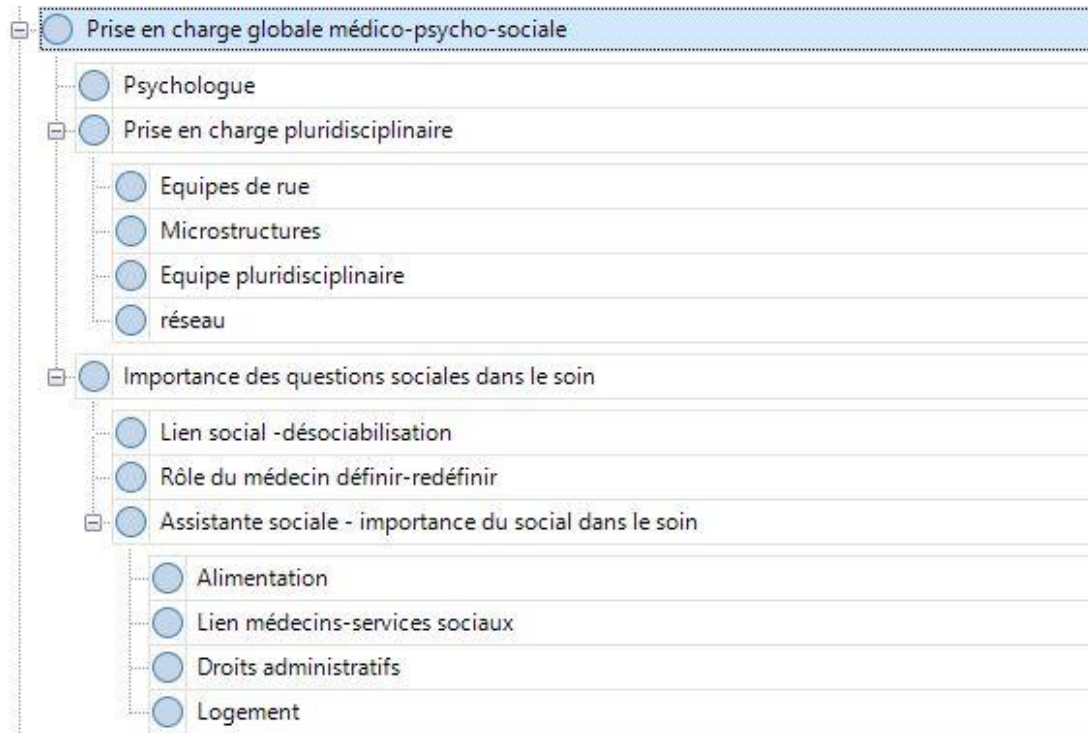

## 7) Phase 1, focus 5 - Solutions to improve the effectiveness and involvement of GPs (« involved GPs »)

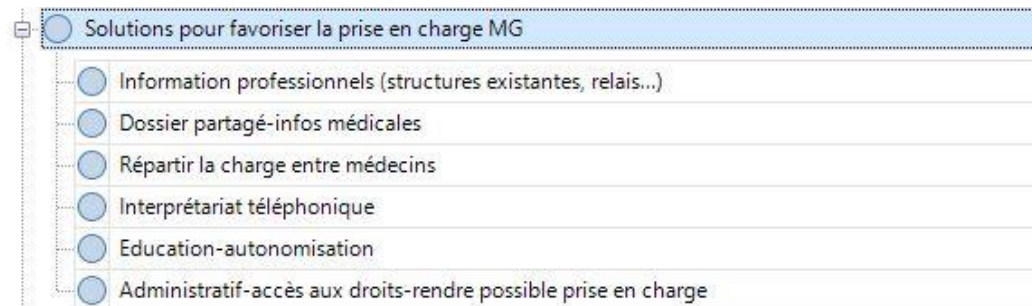

## II. Phase 3 : interviews with « standard GPs »

### 1) Phase 3, Standard GPs and HP - coding tree overview (« standard GPs »)

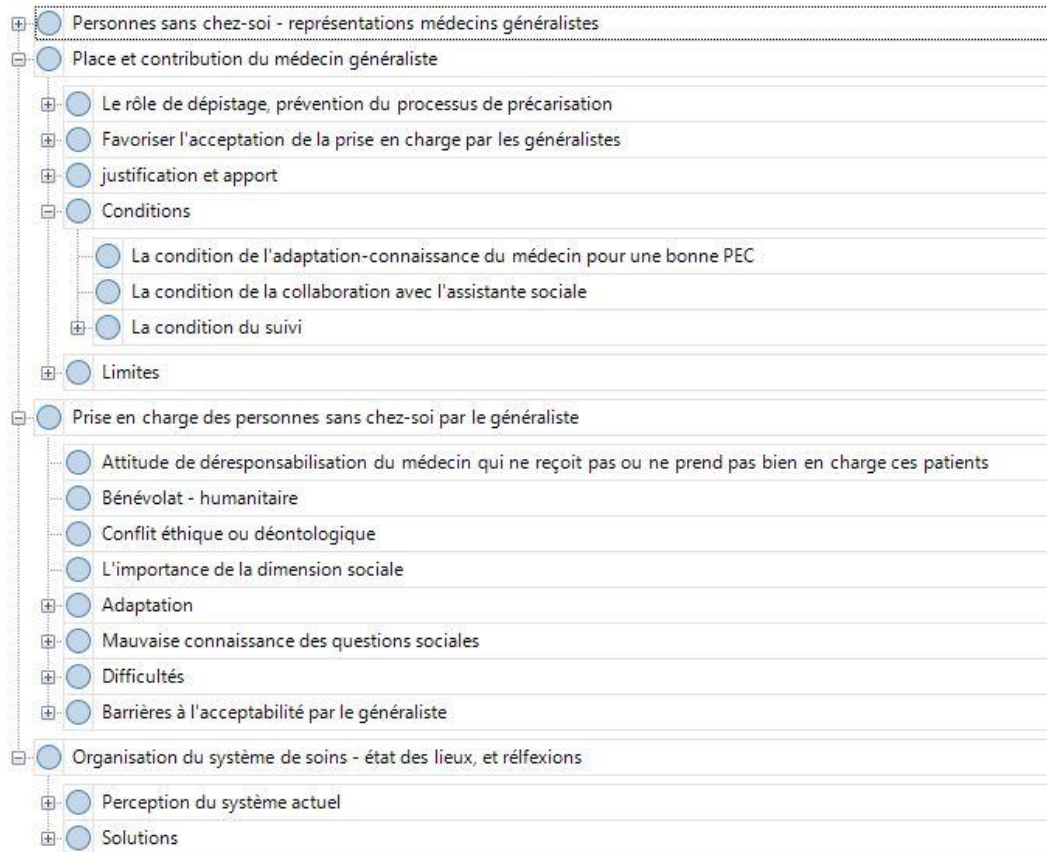

## 2) Phase 3, focus 1 - positive and negative views of standard GPs about homeless people

- ☐  Représentations positives
  - Attitude protectrice envers les patients
  - Respect des comportements et choix de vie de ces patients
  - Comportements
  - Attitude empathique
  - Démarche de compréhension des troubles comme liés à la précarité ou aux pathologies associées
- ☐  Représentations négatives
  - ☐  Jugement négatif du médecin
    - Des personnes avantagées
    - Jugement négatif vis à vis des éléments attendant à la situation de précarité de ces patients
    - Manque de confiance dans les capacités de ces patients
    - Infantilisation et relation paternaliste
    - Des personnes responsables de leur situation
  - ☐  Dénominations négatives pour catégoriser ces patients
    - Les indésirables
    - Sans papiers - clandestins
    - Marginaux, désincérés du système
- ☐  Comportements

### 3) Phase 3, Focus 2 - the follow-up condition, positive factors (« standard » GPs)

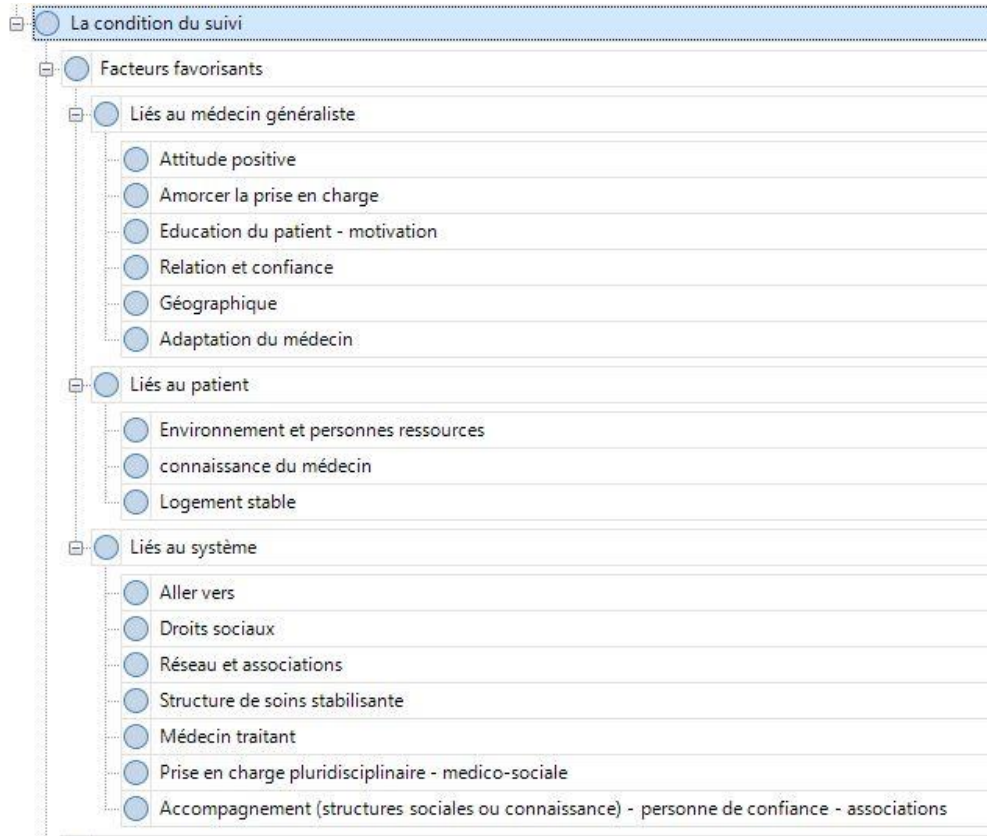



#### 4) Phase 3, focus 3 - the follow-up condition, negative factors (« standard » GPs)

|                                                                                               |
|-----------------------------------------------------------------------------------------------|
| <input type="checkbox"/> Facteurs limitants                                                   |
| <input type="checkbox"/> Liés au médecin généraliste                                          |
| <input type="checkbox"/> Impossibilité du aller vers                                          |
| <input type="checkbox"/> Inadaptation dans la prise en charge                                 |
| <input type="checkbox"/> Attitudes                                                            |
| <input type="checkbox"/> Liés au système                                                      |
| <input type="checkbox"/> Rendez-vous                                                          |
| <input type="checkbox"/> Confiance                                                            |
| <input type="checkbox"/> Absence de structuration de la vie (logement ou structure référente) |
| <input type="checkbox"/> Second recours                                                       |
| <input type="checkbox"/> Droits sociaux                                                       |
| <input type="checkbox"/> Liés au patient                                                      |
| <input type="checkbox"/> autres priorités                                                     |
| <input type="checkbox"/> Confiance envers les médecins                                        |
| <input type="checkbox"/> instabilité - événements de vie                                      |
| <input type="checkbox"/> Absence de domicile                                                  |
| <input type="checkbox"/> Temporalité différente - immédiateté                                 |
| <input type="checkbox"/> Nomadisme médical ou géographique                                    |
| <input type="checkbox"/> Absence de point d'accroche - isolement                              |
| <input type="checkbox"/> Toxicomanie                                                          |
| <input type="checkbox"/> Oubli - rendez-vous                                                  |
| <input type="checkbox"/> sortis ou inadaptés au système                                       |
| <input type="checkbox"/> désintérêt pour leur santé - fuite ou refus de soins                 |

#### 5) Phase 3, Focus 4 - How GPs have to adapt their practice (« standard » GPs)

|                                                                                      |
|--------------------------------------------------------------------------------------|
| <input type="checkbox"/> Adaptation                                                  |
| <input type="checkbox"/> Priorités et attentes différentes                           |
| <input type="checkbox"/> De la relation                                              |
| <input type="checkbox"/> Réinitialier la prise en charge et aller vers               |
| <input type="checkbox"/> De la prise en charge aux conditions de vie et de précarité |
| <input type="checkbox"/> Particularités                                              |
| <input type="checkbox"/> dépendance de ces personnes et surinvestissement du médecin |
| <input type="checkbox"/> Consultations ponctuelles et dépannage d'urgence            |
| <input type="checkbox"/> Nomadisme - plusieurs médecins et ruptures de relation      |
| <input type="checkbox"/> Prise en charge pluridisciplinaire - medico-psycho-sociale  |

## 6) Phase 3, Focus 5 - difficulties when GPs care for homeless people (« standard » GPs)

|                          |                                                                              |
|--------------------------|------------------------------------------------------------------------------|
| <input type="checkbox"/> | Difficultés                                                                  |
| <input type="checkbox"/> | Facteurs aggravant les difficultés                                           |
| <input type="checkbox"/> | La méconnaissance de ces patients                                            |
| <input type="checkbox"/> | La toxicomanie ou autres addictions et les comportements associés            |
| <input type="checkbox"/> | Les problématiques sociales aggravant la complexité de la prise en charge    |
| <input type="checkbox"/> | Difficultés ressenties                                                       |
| <input type="checkbox"/> | Gestion des questions sociales                                               |
| <input type="checkbox"/> | Emotionnelles pour le médecin                                                |
| <input type="checkbox"/> | anxiété face à la complexité des problématiques - liée aux problèmes sociaux |
| <input type="checkbox"/> | Liées au décalage social dans la rencontre de ces patients                   |
| <input type="checkbox"/> | Liées à l'impossibilité de réaliser une prise en charge satisfaisante        |
| <input type="checkbox"/> | Pratiques                                                                    |
| <input type="checkbox"/> | gestion salle d'attente                                                      |
| <input type="checkbox"/> | Temps - chronophage                                                          |
| <input type="checkbox"/> | financières                                                                  |
| <input type="checkbox"/> | Dans l'interaction avec les patients                                         |
| <input type="checkbox"/> | relation avec les accompagnants                                              |
| <input type="checkbox"/> | Relation avec les patients                                                   |
| <input type="checkbox"/> | Prise en charge                                                              |
| <input type="checkbox"/> | Lourdeur de la prise en charge                                               |
| <input type="checkbox"/> | complexité                                                                   |
| <input type="checkbox"/> | Pour une prise en charge médicale efficiente                                 |

## 7) Phase 3, Focus 6 - organizational solutions to improve involvement and effectiveness of GPs (standard GPs)

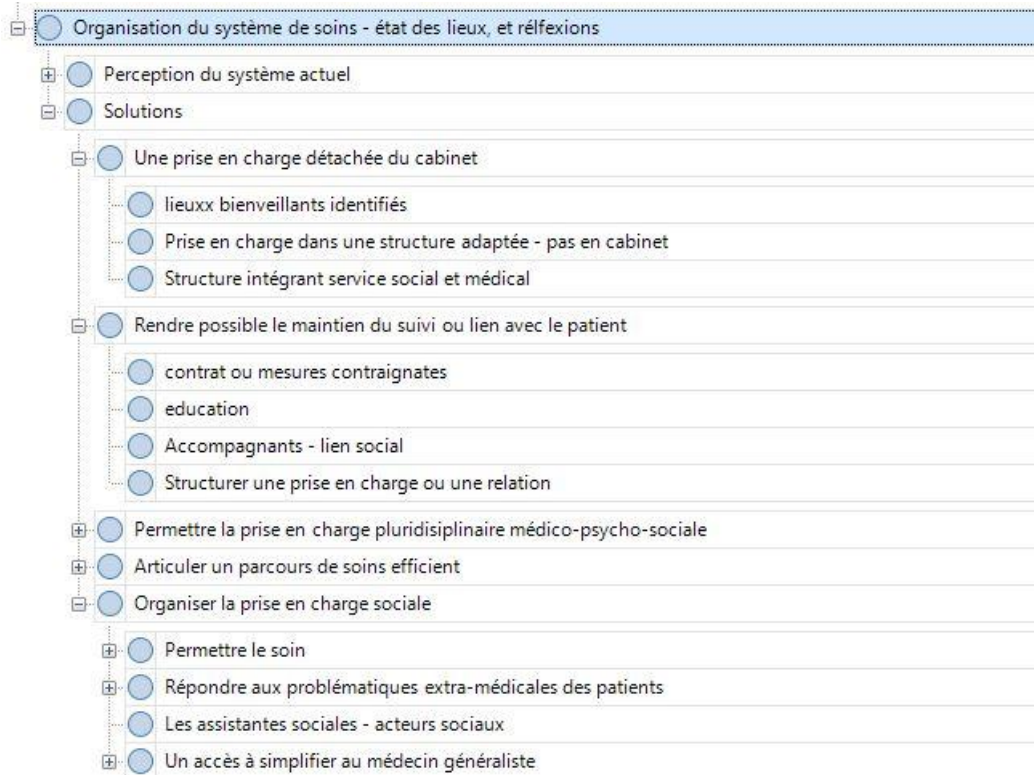

Supplement: bmjopen-2016-013610supp2.pdf [file bmjopen-2016-013610supp2.pdf]
